# Supplementary material for: Influence of hemicellulose content ofEucalyptusandPinusfibers on the grinding process for obtaining cellulose micro/nanofibrils
Source: publisher site journal article supplement (doi:10.1515/hf-2018-0230), 2019-06-16
Supplement: Supplementary file 1 [file hf-2018-0230_suppl.docx]

**Supplementary material**

DOI 10.1515/hf-2018-0230


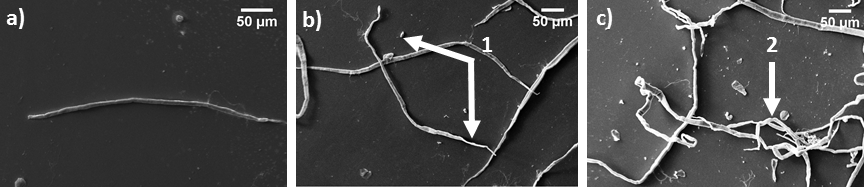


**Supplementary Figure 1:** Typical scanning electron microscopy (SEM) images of fiber curls and kinks in Eucalyptus fibers: (a) UEUC (untreated); (b) after NaOH 5% treatment (EUC5% 2 h); and (c) after NaOH 10% pre-treatment (EUC10% 2 h). Arrow 1 shows the fiber curl and arrow 2 shows kinks.
